# Supplementary material for: Effects of Silica Shell Encapsulated Nanocrystals on Active χ-Fe5C2 Phase and Fischer–Tropsch Synthesis
Source: Nanomaterials (Basel). 2022 Oct 21;12(20):3704. doi: 10.3390/nano12203704 (PMC9610965; doi:10.3390/nano12203704)
Supplement: Supplementary file 1 [file nanomaterials-12-03704-s001.zip › nanomaterials-1952689-supplementary.pdf]

# Effects of silica shell encapsulated nanocrystals on active $\chi$ -Fe<sub>5</sub>C<sub>2</sub> phase and Fischer-Tropsch synthesis

**Seunghee Cha<sup>1</sup>, Heewon Kim<sup>1</sup>, Hyunkyung Choi<sup>2</sup>, Chul Sung Kim<sup>2</sup>, and Kyoung-Su Ha<sup>1,\*</sup>**

<sup>1</sup> Department of Chemical and Biomolecular Engineering, Sogang University, 35 Baekbeom-Ro, Mapo-Gu, Seoul 04107, Republic of Korea;

<sup>2</sup> Department of Physics, Kookmin University, 77 Jeongneung-ro, Seongbuk-gu, Seoul, 02707, Republic of Korea

\*

Correspondence: K.-S. Ha; philoseus@sogang.ac.kr; Tel.: +82-2-3274-4859

## **List of SI**

**Figure S1.** XRD result of  $\chi$ -Fe<sub>5</sub>C<sub>2</sub> nanoparticles.

**Figure S2.** XPS spectra of Fe 2p for  $\chi$ -Fe<sub>5</sub>C<sub>2</sub> @SiO<sub>2</sub> catalysts.

**Figure S3.** XRD results of fresh and spent  $\chi$ -Fe<sub>5</sub>C<sub>2</sub> @SiO<sub>2</sub>-H catalysts.

**Table S1.** N<sub>2</sub> physisorption results of fresh and spent  $\chi$ -Fe<sub>5</sub>C<sub>2</sub>@SiO<sub>2</sub> catalysts.

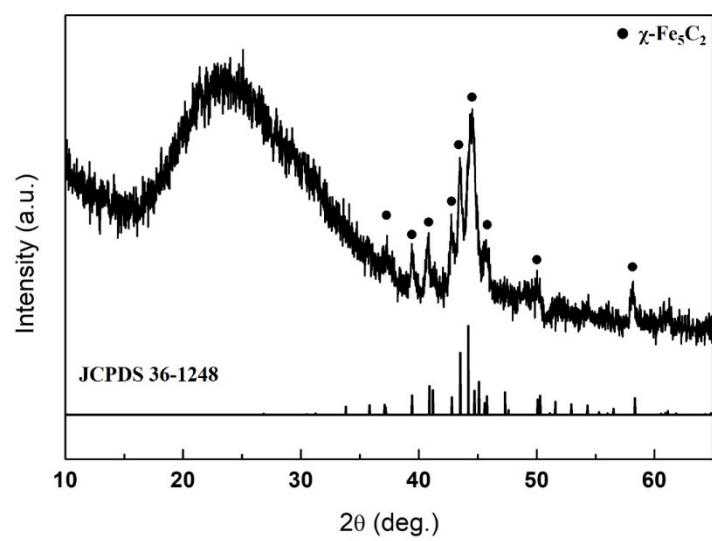

**Figure S1.** XRD result of  $\chi$ -Fe<sub>3</sub>C<sub>2</sub> nanoparticles.

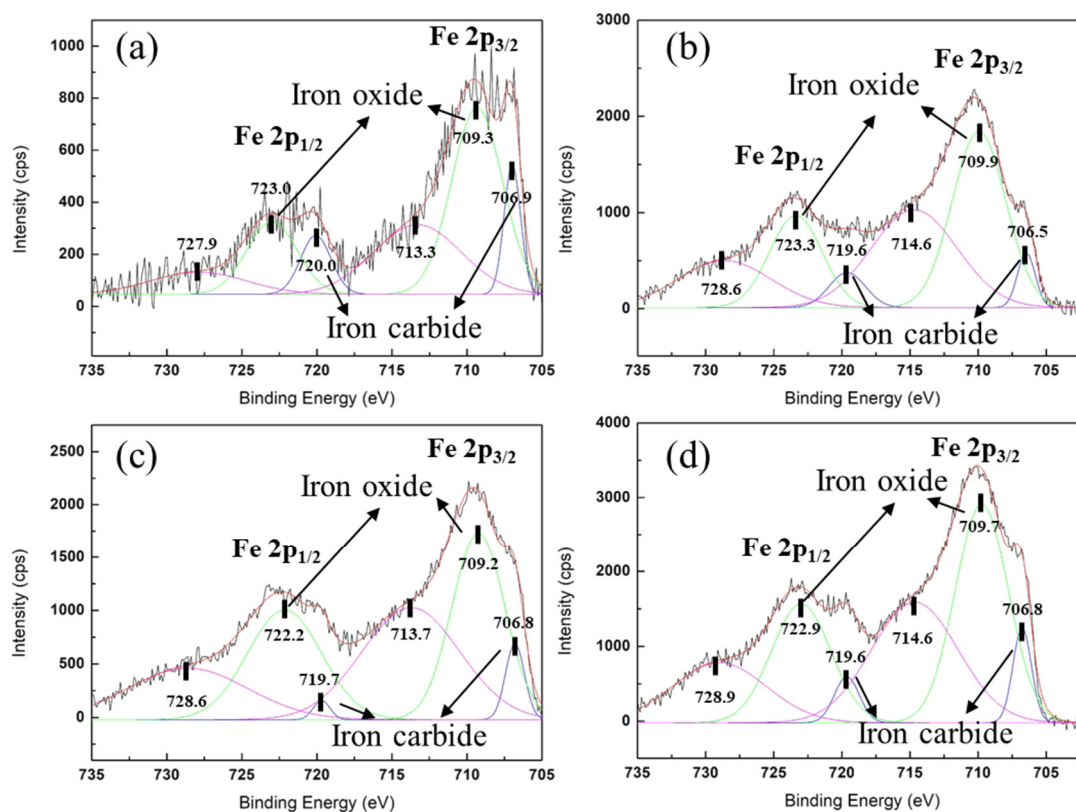

**Figure S2.** XPS spectra of Fe 2p for (a) fresh  $\chi$ -Fe<sub>5</sub>C<sub>2</sub>@SiO<sub>2</sub>\_L catalyst, (b) spent  $\chi$ -Fe<sub>5</sub>C<sub>2</sub>@SiO<sub>2</sub>\_L catalyst, (c) fresh  $\chi$ -Fe<sub>5</sub>C<sub>2</sub>@SiO<sub>2</sub>\_H catalyst, and (d) spent  $\chi$ -Fe<sub>5</sub>C<sub>2</sub>@SiO<sub>2</sub>\_H catalyst after deconvolution.

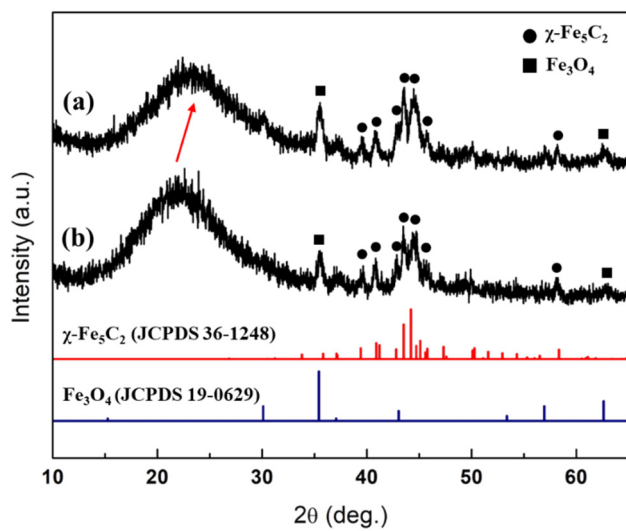

**Figure S3.** XRD results of fresh and spent  $\gamma$ - $\text{Fe}_5\text{C}_2$  @ $\text{SiO}_2$ -H catalysts. (a) spent catalyst, (b) fresh catalyst.

**Table S1.** N<sub>2</sub> physisorption results of fresh and spent  $\chi$ -Fe<sub>5</sub>C<sub>2</sub>@SiO<sub>2</sub> catalysts.

| Sample                                                               | S <sub>BET</sub> [m <sup>2</sup> /g] | V <sub>p</sub> [cm <sup>3</sup> /g] | Average d <sub>p</sub> [nm] | Mesopore d <sub>p</sub> [nm] <sup>a</sup> |
|----------------------------------------------------------------------|--------------------------------------|-------------------------------------|-----------------------------|-------------------------------------------|
| Fresh<br>$\chi$ -Fe <sub>5</sub> C <sub>2</sub> @SiO <sub>2</sub> _L | 301                                  | 0.5                                 | 7.0                         | 2.3                                       |
| Spent<br>$\chi$ -Fe <sub>5</sub> C <sub>2</sub> @SiO <sub>2</sub> _L | 880                                  | 1.0                                 | 4.1                         | 2.6                                       |
| Fresh<br>$\chi$ -Fe <sub>5</sub> C <sub>2</sub> @SiO <sub>2</sub> _H | 238                                  | 0.3                                 | 5.7                         | 2.2                                       |
| Spent<br>$\chi$ -Fe <sub>5</sub> C <sub>2</sub> @SiO <sub>2</sub> _H | 766                                  | 0.8                                 | 3.9                         | 2.5                                       |

<sup>a</sup> Mesopore d<sub>p</sub> was calculated with the pores below 10 nm.
